# Supplementary material
Source: PubMed Central journal article supplement (PMC9662861)
Supplement: can-21-0899_supplemental_file_1_suppsd1.pdf [file can-21-0899_supplemental_file_1_suppsd1.pdf]

# 1 Generative process

1. For each sample  $s, s \in \{1, 2, \dots, S\}$ :
  - (a) Generate signature proportions  $\theta_s \sim Dir^K(\omega)$
  - (b) For each mutation motif  $x_n, n \in \{1, 2, \dots, N_s\}$ :
    - i. Generate signature type  $z_n \sim Multinomial(\theta_s)$
    - ii. Generate mutation type  $x_n \sim Multinomial(\eta_{z_n})$

$S$ : Number of samples

$N_s$ : Number of mutations in sample  $s$

$K$ : Number of signatures

$\eta_k$ : mutation distribution for signature  $k$ , known *a priori*

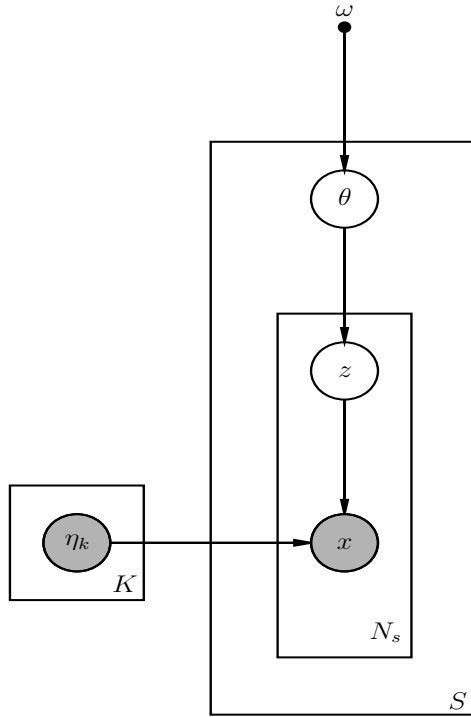

Plate diagram

# 2 Likelihood

$$P(x, \boldsymbol{\theta}, \mathbf{z} | \omega, \boldsymbol{\eta}) = \prod_{s=1}^S P_{Dir}(\theta_s | \omega) \left[ \prod_{n=1}^{N_s} P_{Mult}(z_n | \theta_s) P_{Mult}(x_n | \eta_{z_n}) \right] \quad (1)$$

, where  $\omega$  is the hyperparameter for  $\theta$

### 3 Inference

Log-likelihood is:

$$\log P(x, \boldsymbol{\theta}, \mathbf{z}|\omega, \boldsymbol{\eta}) = \sum_{s=1}^S \left[ \log P_{Dir}(\theta_s|\omega) + \left( \sum_{n=1}^{N_s} \log P_{Mult}(z_n|\theta_s) + \log P_{Mult}(x_n|\eta_{z_n}) \right) \right] \quad (2)$$

Log-likelihood for mutations within one sample can be written as:

$$\log P = \log P(\theta_s|\omega) + \left( \sum_{n=1}^{N_s} \log P(z_n|\theta_s) + \log P(x_n|\eta_{z_n}) \right) \quad (3)$$

We use variational inference to estimate parameters, and use variational distributions  $q(\boldsymbol{\theta}, \mathbf{z}|\boldsymbol{\alpha}, \boldsymbol{\pi})$  to approximate and decouple  $\boldsymbol{\theta}$  and  $\mathbf{z}$ . The variational distribution is specified as following:

$$q(\boldsymbol{\theta}_s, \mathbf{z}|\alpha_s, \boldsymbol{\pi}) = \prod_{s=1}^S q_{Dir}(\theta_s|\alpha_s) \left( \prod_{n=1}^{N_s} q_{Mult}(z_n|\pi_n) \right) \quad (4)$$

Using Jensen's inequality, we have:

$$\begin{aligned} \log P(x|\omega, \boldsymbol{\eta}) &= \log \int_{\boldsymbol{\theta}} \int_{\mathbf{z}} P(x, \boldsymbol{\theta}, \mathbf{z}|\omega, \boldsymbol{\eta}) d\mathbf{z} d\boldsymbol{\theta} \\ &= \log \int_{\boldsymbol{\theta}} \int_{\mathbf{z}} \frac{P(x, \boldsymbol{\theta}, \mathbf{z}|\omega, \boldsymbol{\eta})}{q(\boldsymbol{\theta}, \mathbf{z}|\boldsymbol{\alpha}, \boldsymbol{\pi})} q(\boldsymbol{\theta}, \mathbf{z}|\boldsymbol{\alpha}, \boldsymbol{\pi}) d\mathbf{z} d\boldsymbol{\theta} \\ &\geq \int_{\boldsymbol{\theta}} \int_{\mathbf{z}} \log \frac{P(x, \boldsymbol{\theta}, \mathbf{z}|\omega, \boldsymbol{\eta})}{q(\boldsymbol{\theta}, \mathbf{z}|\boldsymbol{\alpha}, \boldsymbol{\pi})} q(\boldsymbol{\theta}, \mathbf{z}|\boldsymbol{\alpha}, \boldsymbol{\pi}) d\mathbf{z} d\boldsymbol{\theta} \\ &= \int_{\boldsymbol{\theta}} \int_{\mathbf{z}} [\log P(x, \boldsymbol{\theta}, \mathbf{z}|\omega, \boldsymbol{\eta}) - \log q(\boldsymbol{\theta}, \mathbf{z}|\boldsymbol{\alpha}, \boldsymbol{\pi})] q(\boldsymbol{\theta}, \mathbf{z}|\boldsymbol{\alpha}, \boldsymbol{\pi}) d\mathbf{z} d\boldsymbol{\theta} \\ &= \int_{\boldsymbol{\theta}} \int_{\mathbf{z}} \log P(x, \boldsymbol{\theta}, \mathbf{z}|\omega, \boldsymbol{\eta}) q(\boldsymbol{\theta}, \mathbf{z}|\boldsymbol{\alpha}, \boldsymbol{\pi}) d\mathbf{z} d\boldsymbol{\theta} - \int_{\boldsymbol{\theta}} \int_{\mathbf{z}} \log q(\boldsymbol{\theta}, \mathbf{z}|\boldsymbol{\alpha}, \boldsymbol{\pi}) q(\boldsymbol{\theta}, \mathbf{z}|\boldsymbol{\alpha}, \boldsymbol{\pi}) d\mathbf{z} d\boldsymbol{\theta} \\ &= E_{q(\boldsymbol{\theta}, \mathbf{z}|\boldsymbol{\alpha}, \boldsymbol{\pi})}[\log P(x, \boldsymbol{\theta}, \mathbf{z}|\omega, \boldsymbol{\eta})] - E_{q(\boldsymbol{\theta}, \mathbf{z}|\boldsymbol{\alpha}, \boldsymbol{\pi})}[\log q(\boldsymbol{\theta}, \mathbf{z}|\boldsymbol{\alpha}, \boldsymbol{\pi})] \end{aligned} \quad (5)$$

The right-hand side of equation(5) is the evidence lower bound which we will refer to as  $L(\boldsymbol{\alpha}, \boldsymbol{\pi}; \omega)$ . To maximize the lower bound is equivalent to minimizing the KL divergence between the variational posterior distributions and true posterior distributions.

We use  $q$  to denote  $q(\boldsymbol{\theta}, \mathbf{z}|\boldsymbol{\alpha}, \boldsymbol{\pi})$  in subscripts and expand evidence lower bound by plugging in equation(2) and equation(4) as follows:

$$\begin{aligned} L(\boldsymbol{\alpha}, \boldsymbol{\pi}; \omega) &= E_q[\log P(x, \boldsymbol{\theta}, \mathbf{z}|\omega, \boldsymbol{\eta})] - E_q[\log q(\boldsymbol{\theta}, \mathbf{z}|\boldsymbol{\alpha}, \boldsymbol{\pi})] \\ &= E_q \left[ \sum_{s=1}^S \left( \log P(\theta_s|\omega) + \sum_{n=1}^{N_s} (\log P(z_n|\theta_s) + \log P(x_n|\eta_{z_n})) \right) \right] \\ &\quad - E_q \left[ \sum_{s=1}^S \left( \log q(\theta_s|\alpha_s) + \sum_{n=1}^{N_s} \log q(z_n|\pi_n) \right) \right], \end{aligned} \quad (6)$$

where  $\alpha_s$  is the parameter vector of length  $K$  in the Dirichlet distribution for  $\theta_s$ ,  $\pi_n$  is the parameter vector of length  $K$  in the multinomial distribution for  $z_n$ .

We can maximize the lower bound with respect to variational parameters within each sample. The lower bound within one sample can then be written and expanded as:

$$\begin{aligned}
L_s(\boldsymbol{\alpha}, \boldsymbol{\pi}; \boldsymbol{\omega}) &= E_q \left[ \log P(\theta_s | \boldsymbol{\omega}) + \sum_{n=1}^{N_s} (\log P(z_n | \theta_s) + \log P(x_n | \eta_{z_n})) \right] \\
&- E_q \left[ \log q(\theta_s | \alpha_s) + \sum_{n=1}^{N_s} \log q(z_n | \pi_n) \right] \\
&= E_q \left[ \log \Gamma\left(\sum_{k=1}^K \omega_k\right) - \sum_{k=1}^K \log \Gamma(\omega_k) + \sum_{k=1}^K (\omega_k - 1) \log \theta_{k,s} \right] \\
&+ E_q \left[ \sum_{k=1}^K \sum_{n=1}^{N_s} I(z_n = k) \log \theta_{k,s} \right] \\
&+ E_q \left[ \sum_{k=1}^K \sum_{n=1}^{N_s} \sum_{t=1}^T I(z_n = k) x_n^t \log \eta_k^t \right] \\
&- E_q \left[ \log \Gamma\left(\sum_{k=1}^K \alpha_{s,k}\right) - \sum_{k=1}^K \log \Gamma(\alpha_{s,k}) + \sum_{k=1}^K (\alpha_{s,k} - 1) \log \theta_{s,k} \right] \\
&- E_q \left[ \sum_{k=1}^K \sum_{n=1}^{N_s} I(z_n = k) \log \pi_{n,k} \right] \\
&= \left[ \log \Gamma\left(\sum_{k=1}^K \omega_k\right) - \sum_{k=1}^K \log \Gamma(\omega_k) + \sum_{k=1}^K (\omega_k - 1) \left( \Psi(\alpha_k) - \Psi\left(\sum_{k''=1}^K \alpha_{s,k''}\right) \right) \right] \\
&+ \left[ \sum_{k=1}^K \sum_{n=1}^{N_s} \pi_{n,k} \left( \Psi(\alpha_k) - \Psi\left(\sum_{k''=1}^K \alpha_{s,k''}\right) \right) \right] \\
&+ \left[ \sum_{k=1}^K \sum_{n=1}^{N_s} \sum_{t=1}^T \pi_{n,k} x_n^t \log \eta_k^t \right] \\
&- \left[ \log \Gamma\left(\sum_{k=1}^K \alpha_{s,k}\right) - \sum_{k=1}^K \log \Gamma(\alpha_{s,k}) + \sum_{k=1}^K (\alpha_{s,k} - 1) \left( \Psi(\alpha_{s,k}) - \Psi\left(\sum_{k''=1}^K \alpha_{s,k''}\right) \right) \right] \\
&- \left[ \sum_{k=1}^K \sum_{n=1}^{N_s} \pi_{n,k} \log \pi_{n,k} \right],
\end{aligned} \tag{7}$$

where  $I$  is indication function being either 1 or 0 depending on whether the equation therein is true or not;  $\omega_k$  is the  $k$ -th element in parameter  $\boldsymbol{\omega}$ , which is set to be symmetric as prior;  $\alpha_{s,k}$  is the  $k$ -th element in  $\alpha_s$ ;  $\eta_k^t$ ,  $t \in \{1, 2, \dots, T\}$ , is the  $t$ -th element in signature probability  $\boldsymbol{\eta}_k$  corresponding to mutation type  $t$ , and  $x_n^t$  is 1 when  $x_n$  is observed as mutation  $t$ , and is 0 if otherwise.

We maximize lower bound with respect to each variational parameters. First, we isolate terms in  $L_s(\boldsymbol{\alpha}, \boldsymbol{\pi}; \boldsymbol{\omega})$  containing  $\pi_{n,k}$  and add Lagrange multiplier based on the constraint  $1 = \sum_{k=1}^K \pi_{n,k}$ , then maximize it with respect to  $\pi_{n,k}$ :

$$\begin{aligned}
L_s^{[\pi_{n,k}]} &= \left[ \sum_{k'=1}^K \pi_{n,k'} (\Psi(\alpha_{s,k'}) - \Psi(\sum_{k''=1}^K \alpha_{s,k''})) \right] \\
&+ \left[ \sum_{k'=1}^K \sum_{t=1}^T \pi_{n,k'} x_n^t \log \eta_k^t \right] \\
&- \left[ \sum_{k'=1}^K \pi_{n,k'} \log \pi_{n,k'} \right] \\
&+ \lambda_n \left( \sum_{k'=1}^K \pi_{n,k'} - 1 \right)
\end{aligned} \tag{8}$$

Take derivatives with respect to  $\pi_{n,k}$ , we have:

$$\begin{aligned}
\frac{\partial L_s^{[\pi_{n,k}]} }{\partial \pi_{n,k}} &= \left[ (\Psi(\alpha_{s,k}) - \Psi(\sum_{k''=1}^K \alpha_{s,k''})) \right] \\
&+ \left[ \sum_{t=1}^T x_n^t \log \eta_k^t \right] \\
&- [\log \pi_{n,k} + 1] \\
&+ \lambda_n
\end{aligned} \tag{9}$$

Setting this derivative to zero we yield:

$$\pi_{n,k} \propto \exp \left\{ \Psi(\alpha_{s,k}) - \Psi\left(\sum_{k''=1}^K \alpha_{s,k''}\right) + \sum_{t=1}^T x_n^t \log \eta_k^t \right\} \tag{10}$$

We can further simplify equation(10) since  $x_n$  is observed:

$$\begin{aligned}
\pi_{n,k}^t &\propto \exp \left\{ \Psi(\alpha_{s,k}) - \Psi\left(\sum_{k''=1}^K \alpha_{s,k''}\right) + \log \eta_k^t \right\} \\
&= \eta_k^t \exp \left\{ \Psi(\alpha_{s,k}) - \Psi\left(\sum_{k''=1}^K \alpha_{s,k''}\right) \right\}
\end{aligned} \tag{11}$$

Similarly we isolate terms containing  $\alpha_{s,k}$  in the lower bound and maximize it with respect to  $\alpha_{s,k}$ :

$$\begin{aligned}
L_s^{[\alpha_{s,k}]} &= \left[ \sum_{k'=1}^K (\omega_{k'} - 1) (\Psi(\alpha_{s,k'}) - \Psi(\sum_{k''=1}^K \alpha_{s,k''})) \right] \\
&+ \left[ \sum_{k'=1}^K \sum_{n=1}^{N_s} \pi_{n,k'} (\Psi(\alpha_{s,k'}) - \Psi(\sum_{k''=1}^K \alpha_{s,k''})) \right] \\
&- \left[ \log \Gamma\left(\sum_{k''=1}^K \alpha_{s,k''}\right) - \sum_{k'=1}^K \log \Gamma(\alpha_{s,k'}) + \sum_{k'=1}^K (\alpha_{s,k'} - 1) (\Psi(\alpha_{s,k'}) - \Psi(\sum_{k''=1}^K \alpha_{s,k''})) \right]
\end{aligned} \tag{12}$$

Take derivatives with respect to  $\alpha_{s,k}$  we yiled:

$$\begin{aligned}
\frac{\partial L_s^{[\alpha_{s,k}]} }{\partial \alpha_{s,k}} &= \left[ (\omega_k - 1)\Psi'(\alpha_{s,k}) - \left( \sum_{k=1}^K \omega_k - K \right) \Psi' \left( \sum_{k''=1}^K \alpha_{s,k''} \right) \right] \\
&+ \left[ \sum_{n=1}^{N_s} \pi_{n,k} (\Psi'(\alpha_{s,k}) - K \Psi' \left( \sum_{k''=1}^K \alpha_{s,k''} \right)) \right] \\
&- \left[ \Psi \left( \sum_{k''=1}^K \alpha_{s,k''} \right) - \Psi(\alpha_{s,k}) + (\Psi(\alpha_{s,k}) - \Psi \left( \sum_{k''=1}^K \alpha_{s,k''} \right)) + (\alpha_{s,k} - 1)\Psi'(\alpha_{s,k}) - \left( \sum_{k'=1}^K \alpha_{s,k'} - K \right) \Psi' \left( \sum_{k''=1}^K \alpha_{s,k''} \right) \right] \\
&= (\omega_k + \sum_{n=1}^{N_s} \pi_{n,k} - \alpha_{s,k})\Psi'(\alpha_{s,k}) + \sum_{k'=1}^K (-\omega_{k'} - \sum_{n=1}^{N_s} \pi_{n,k'} + \alpha_{s,k'})\Psi' \left( \sum_{k''=1}^K \alpha_{s,k''} \right) \\
&= (\omega_k + \sum_{n=1}^{N_s} \pi_{n,k} - \alpha_{s,k})\Psi'(\alpha_{s,k}) - \sum_{k'=1}^K (\omega_{k'} + \sum_{n=1}^{N_s} \pi_{n,k'} - \alpha_{s,k'})\Psi' \left( \sum_{k''=1}^K \alpha_{s,k''} \right)
\end{aligned} \tag{13}$$

Setting the equation above to be zero we have one solution as:

$$\alpha_{s,k} = \omega_k + \sum_{n=1}^{N_s} \pi_{n,k} \tag{14}$$

To update posterior parameter  $\omega$ , we isolate terms containing  $\omega$  from the lower bound cross all samples and take derivatives in the following two equations:

$$L^{[\omega_k]} = \sum_{s=1}^S \left[ \log \Gamma \left( \sum_{k''=1}^K \omega_{k''} \right) - \sum_{k'=1}^K \log \Gamma(\omega_{k'}) + \sum_{k'=1}^K (\omega_{k'} - 1) (\Psi(\alpha_{k'}) - \Psi \left( \sum_{k''=1}^K \alpha_{s,k''} \right)) \right] \tag{15}$$

$$\frac{\partial L^{[\omega_k]} }{\partial \omega_k} = \sum_{s=1}^S \left[ \Psi \left( \sum_{k''=1}^K \omega_{k''} \right) - \Psi(\omega_k) + (\Psi(\alpha_k) - \Psi \left( \sum_{k''=1}^K \alpha_{s,k''} \right)) \right] \tag{16}$$

To approximate the estimation, we use Newton-Raphson algorithm by using the second derivatives (Hessian matrix) of the lower bound with respect to  $\omega_k$ . Elements in Hessian matrix is as follows:

$$\begin{aligned}
\frac{\partial L^{[\omega_k]} }{\partial \omega_k \partial \omega_j} &= \sum_{s=1}^S \left[ \Psi' \left( \sum_{k''=1}^K \omega_{k''} \right) \right] \\
&= S \Psi' \left( \sum_{k''=1}^K \omega_{k''} \right), j \neq k, j \in \{1, 2, \dots, K\} \\
\frac{\partial L^{[\omega_k]} }{\partial \omega_k \partial \omega_j} &= S \Psi' \left( \sum_{k''=1}^K \omega_{k''} \right) - S \Psi'(\omega_k), j = k
\end{aligned} \tag{17}$$

We use  $H_\omega$  and  $G_\omega$  to denote second derivatives and first derivatives of lower bound with respect to  $\omega$  respectively. Using Newton-Raphson algorithm to approximate posterior  $\omega$  is in the following:

$$\omega_{new} = \omega_{old} - H_{\omega_{old}}^{-1} G_{\omega_{old}}, \tag{18}$$

Iterate equation(18) until convergence.
